# Supplementary material for: Assay of serum cholinesterase activity by an amperometric biosensor based on a co-crosslinked choline oxidase/overoxidized polypyrrole bilayer
Source: Royal Society of Chemistry journal article supplement (doi:10.1039/c7an01757j), 2018-01-01
Supplement: c7an01757j1.pdf [file c7an01757j1.pdf]

## Electronic Supplementary Information

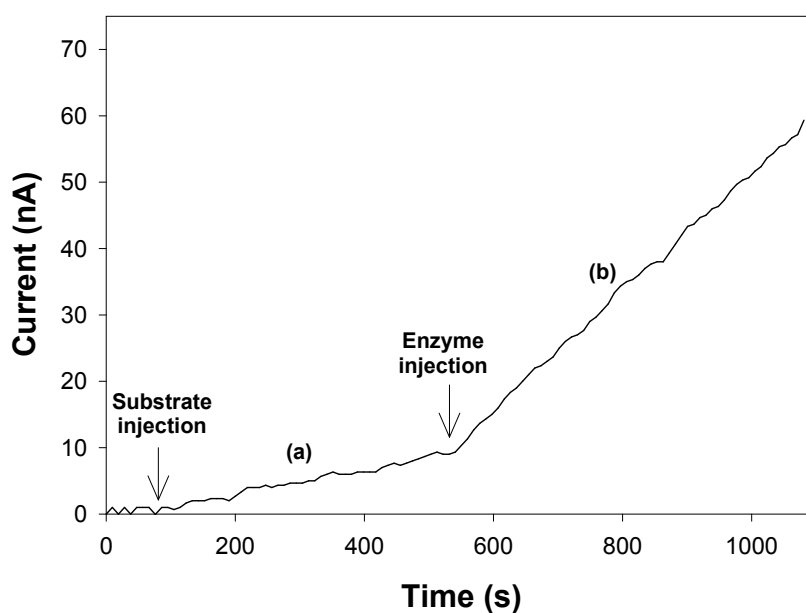

**Figure S1.** Spontaneous (a) and enzymatic (b) substrate hydrolysis. Supporting electrolyte: phosphate buffer pH 8.5, I 0.1 M. Substrate: butyrylcholine 1.75 mM. Enzyme: BChE 1 U L<sup>-1</sup>. Electrode rotation rate: 200 rpm.

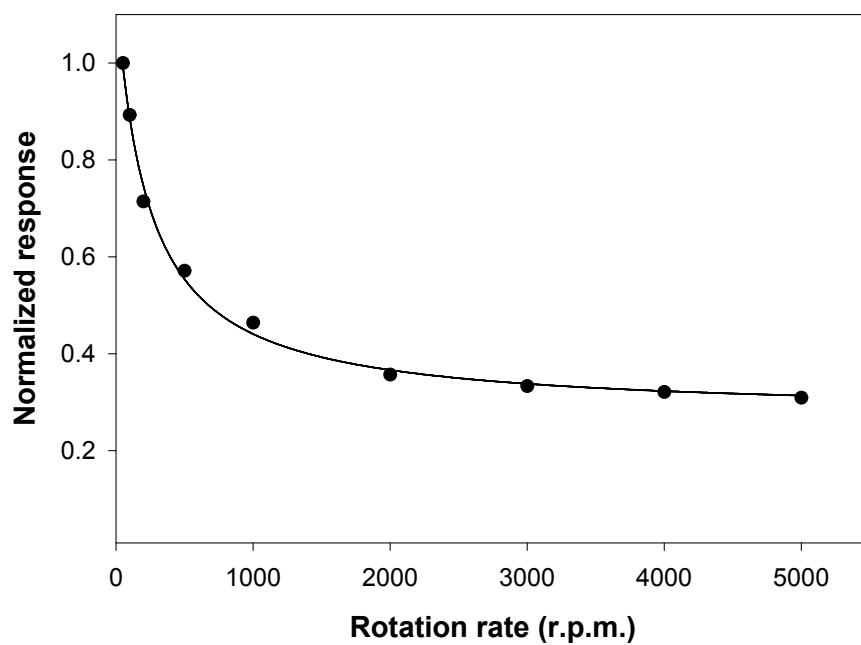

**Figure S2.** Variation of the current signal slopes as a function of the rotation rate at a Pt/PPyox/ChO biosensor upon addition of acetylcholine 1 mM and AChE 10 U L<sup>-1</sup>. Supporting electrolyte: phosphate buffer pH 7.8, 1.0 M. Temperature: 25 °C.

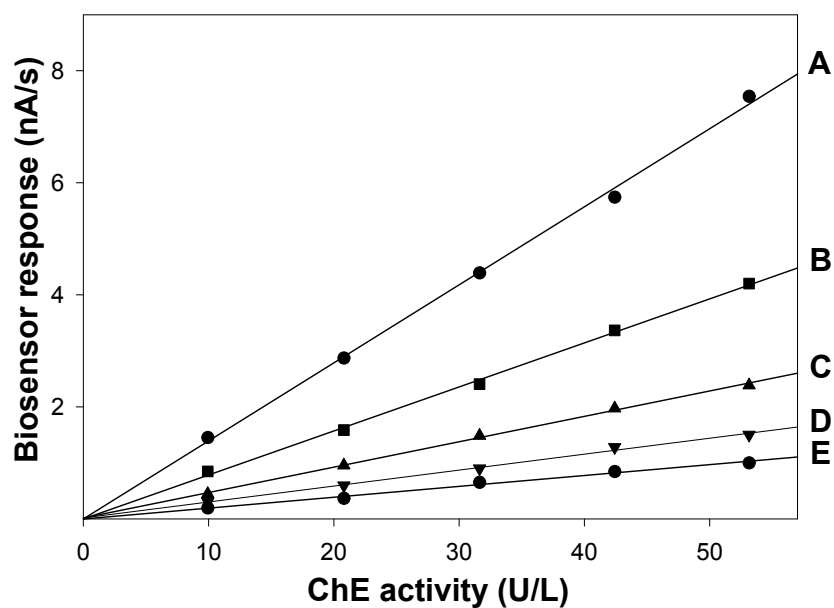

**Figure S3** Calibration curves for various ChE/substrate couples: AChE/acetylcholine (A); BChE/butrylcholine (B); BChE/s-butrylthiocholine (C); BChE/benzoylcholine (D); BChE/acetylcholine (E). Substrate concentration: 1 mM. Supporting electrolyte: phosphate buffer pH 7.8, I 0.1 M. Temperature: 25 °C. Electrode rotation rate: 200 rpm.
